# Supplementary material for: Insights into Watson–Crick/Hoogsteen breathing dynamics and damage repair from the solution structure and dynamic ensemble of DNA duplexes containing m1A
Source: PubMed Central journal article supplement — Nucleic Acids Res. 2017 Mar 21;45(9):5586–601. doi: 10.1093/nar/gkx186 (PMC5435913; doi:10.1093/nar/gkx186), 2017-03-21
Supplement: gkx186_Supp.pdf [file gkx186_Supp.pdf]

**Insights into Watson-Crick/Hoogsteen Breathing Dynamics and Damage Repair  
from the Solution Structure and Dynamic Ensemble of DNA Duplexes containing  
m<sup>1</sup>A**

Bharathwaj Sathyamoorthy<sup>1,2</sup>, Honglue Shi<sup>2</sup>, Huiqing Zhou<sup>1</sup>, Yi Xue<sup>1,2</sup>, Atul Rangadurai<sup>1</sup>,  
Dawn K. Merriman<sup>2</sup>, and Hashim M. Al-Hashimi<sup>1,2,\*</sup>

**Supplementary Information**

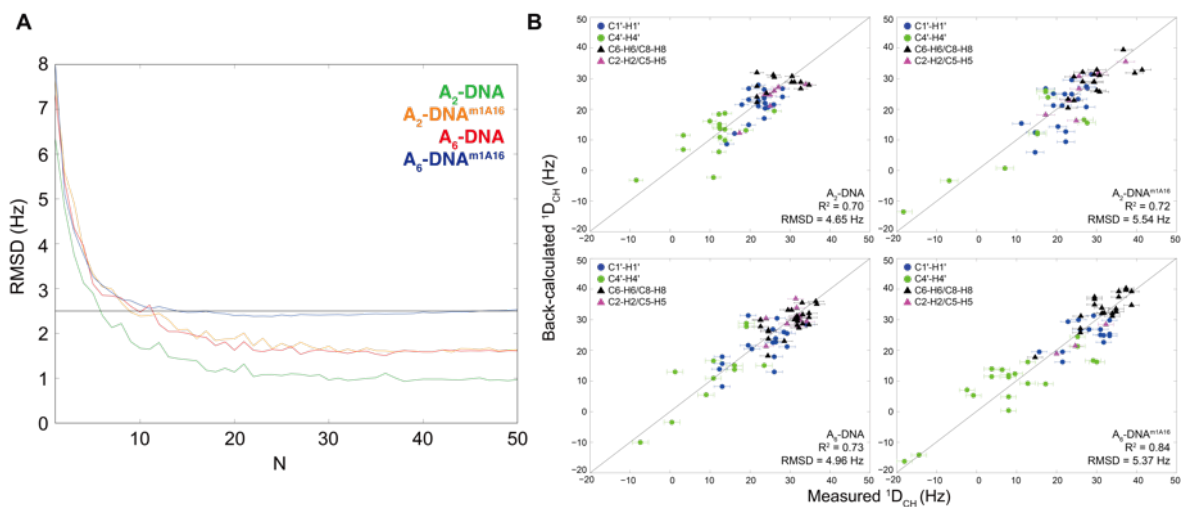

**Figure S1.** (A) Comparison of measured and predicted RDCs (normalized RMSD) as a function of ensemble size (N) used in SAS. (B) Cross-validation of ensembles to assess the agreement between RDC-selected ensembles with the subset of RDCs (25%) that was not included in SAS. While we observe some deterioration in the cross-validation RDC RMSD (4.6-5.6 Hz) and  $R^2 = 0.70$ -0.84 relative to the SAS ensemble (RMSD = 2.4-2.5 Hz and  $R^2 = 0.95$ -0.96) is, the quality of cross-validation analysis is considerably better than the full MD trajectory (RDC RMSD = 6.8-8.5 Hz and  $R^2 = 0.61$ -0.64).

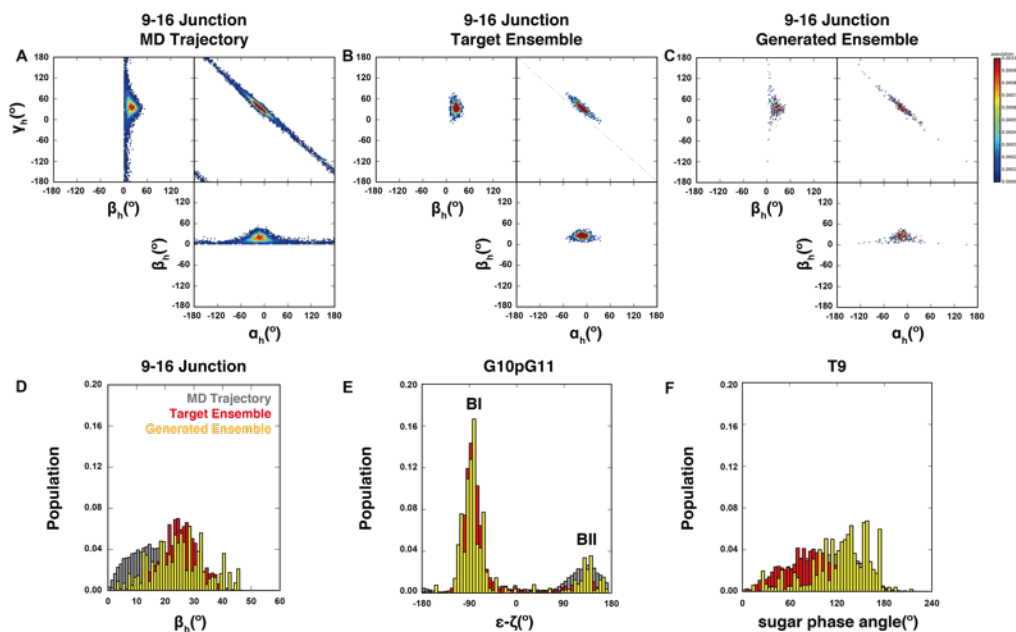

**Figure S2. Simulations testing ability of RDCs to define features of the DNA ensemble.** Comparison of inter-helical kink angles for target and RDC-generated ensembles for target ensembles 1 (A-D), 2 (E) and ensemble 3 (F) (see methods). Shown are 3D inter-helical ( $\alpha_h$ ,  $\beta_h$  and  $\gamma_h$ ) distributions at the A16–T9 junction for (A) MD pool, (B) target ensemble 1, and (C) RDC-generated ensemble. (D) 1D comparison of kink angle ( $\beta_h$ ) distributions at the A16–T9 junction; (E)  $\epsilon$ - $\zeta$  at G10pG11; and (F) sugar phase angle at T9.

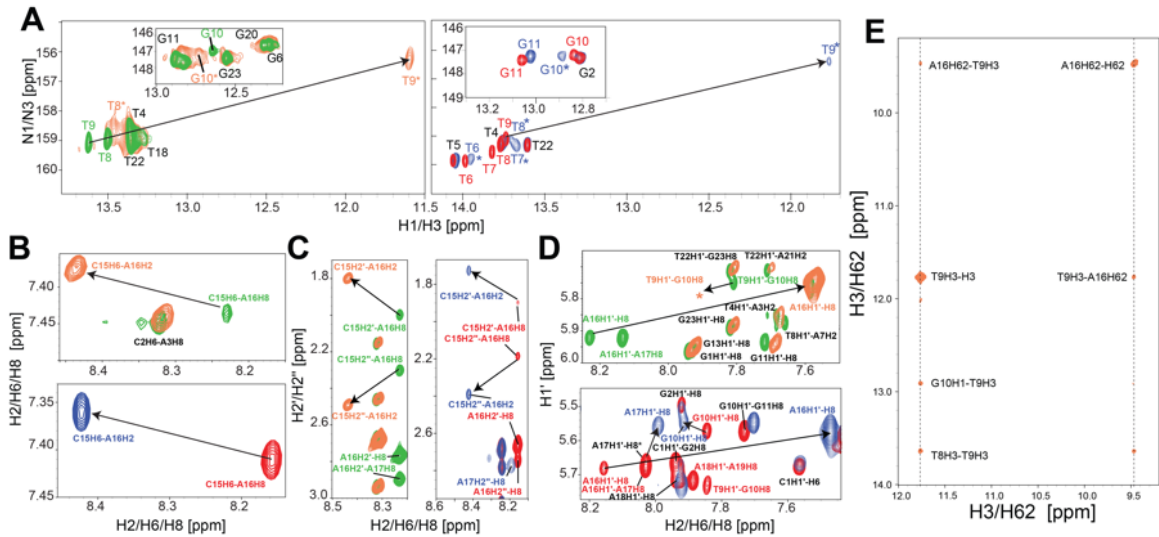

**Figure S3.** (A) 2D [ $^{15}\text{N}$ ,  $^1\text{H}$ ] imino SOFAST-HMQC spectra (1) acquired at 25 °C ( $\text{A}_2$ -DNA,  $\text{A}_6$ -DNA,  $\text{A}_6$ -DNA $^{\text{m}1\text{A}16}$ ) and 5 °C ( $\text{A}_2$ -DNA $^{\text{m}1\text{A}16}$ ) displaying all base paired imino resonances, except the terminal G–C bps. T9-N3/H3 up-field shifted resonance depicting the formation of a non-canonical HG bp with  $\text{m}^1\text{A}16$ . (B-E) 2D [ $^1\text{H}$ ,  $^1\text{H}$ ] NOESY spectra acquired at 25 °C (A-C) and at 9 °C (D) confirming the formation of  $\text{m}^1\text{A}16 \cdot \text{T}9$  HG bp. (B, C) Change in the sequential NOEs between C15-H6/H2'/H2''–A16-H8 to C15-H6/H2'/H2''–A16-H2 and (D) increase in intensity of the A16-H1'–A16-H8 intra-residue NOE identifies the formation of a *syn*  $\text{m}^1\text{A}16$  base. (E) T9-H3–A16-H8 and T9-H3–A-H62 connectivity observed in  $\text{A}_2$ -DNA $^{\text{m}1\text{A}16}$  (2). Sequential imino NOEs between T9-H3 with T8-H3 and G10-H1 indicate stable formation of a duplex.

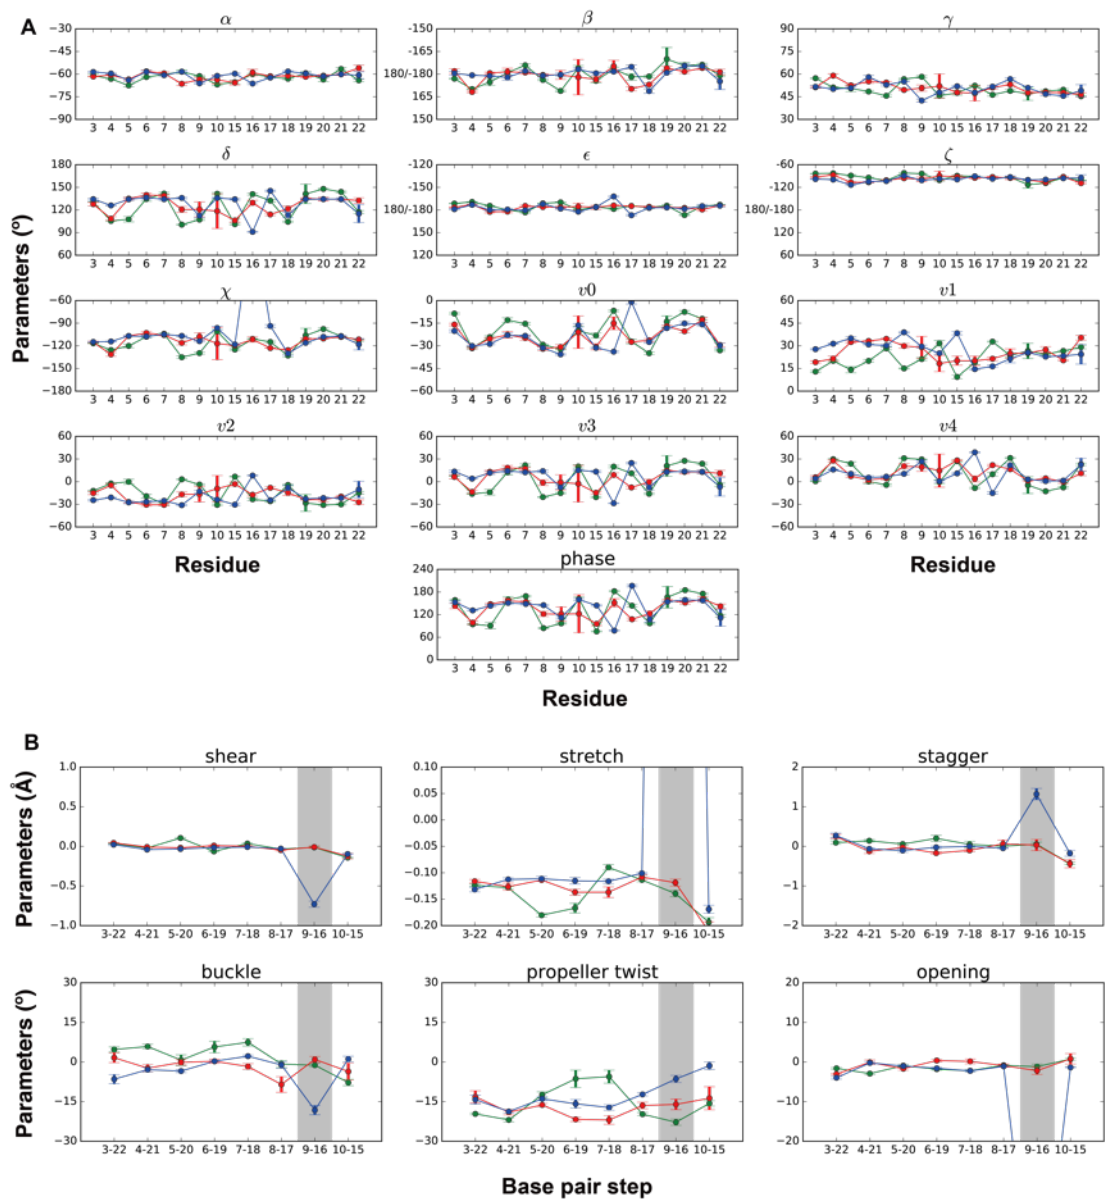

**Figure S4. Local perturbations induced by m<sup>1</sup>A in the solution NMR structures.** (A, B) Shown are average and standard deviations for (A) local torsion and sugar phase angles and (B) base pair parameters for A<sub>2</sub>-DNA (green), A<sub>6</sub>-DNA (red) and A<sub>6</sub>-DNA<sup>m1A16</sup> (blue), respectively. Base pair step parameters involving the T9•m<sup>1</sup>A16 HG bp shaded in grey are omitted due to ill definition of the reference coordinate by 3DNA.

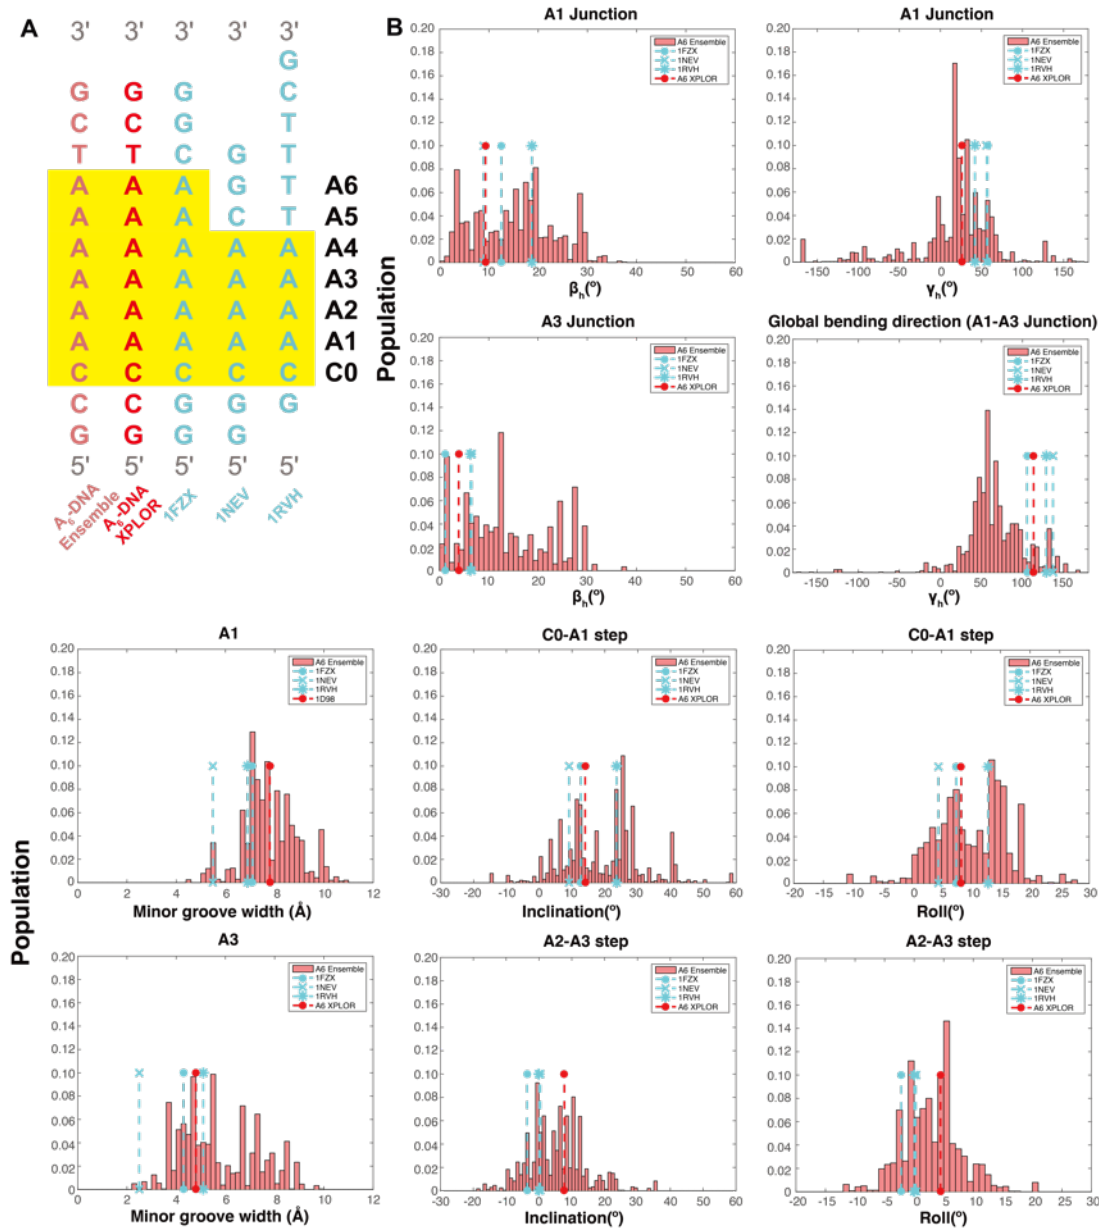

**Figure S5. A<sub>6</sub>-DNA structure and ensemble reproduce structural features of A-tract containing duplexes.** (A) A<sub>6</sub>-DNA ensembles (pink), A<sub>6</sub>-DNA XPLOR structures (red) and prior A-tract solution structures (cyan) marked by PDBID used in this analysis. All the sequences are aligned with the 5'-CAA junctions with residues numbered from C0 to A6. (B) Comparison of local and global structural parameters.

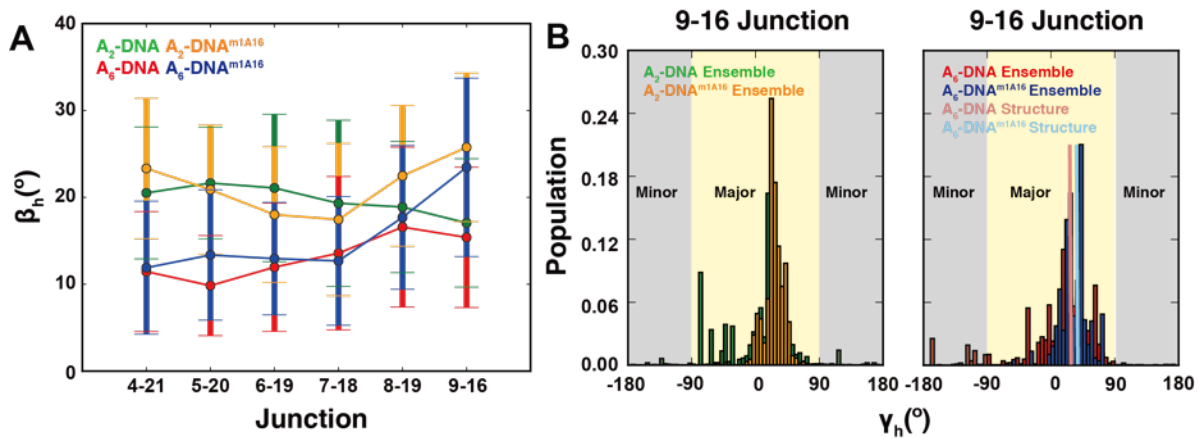

**Figure S6.** (A) Average and standard deviations for local kink angle ( $\beta_h$ ) in RDC-selected ensembles as a function of junction position. (B) Local kinking directions (major versus minor groove, given by  $\gamma_h$ ) at the A16–T9 bp in RDC-selected ensembles and XPLOR structures.

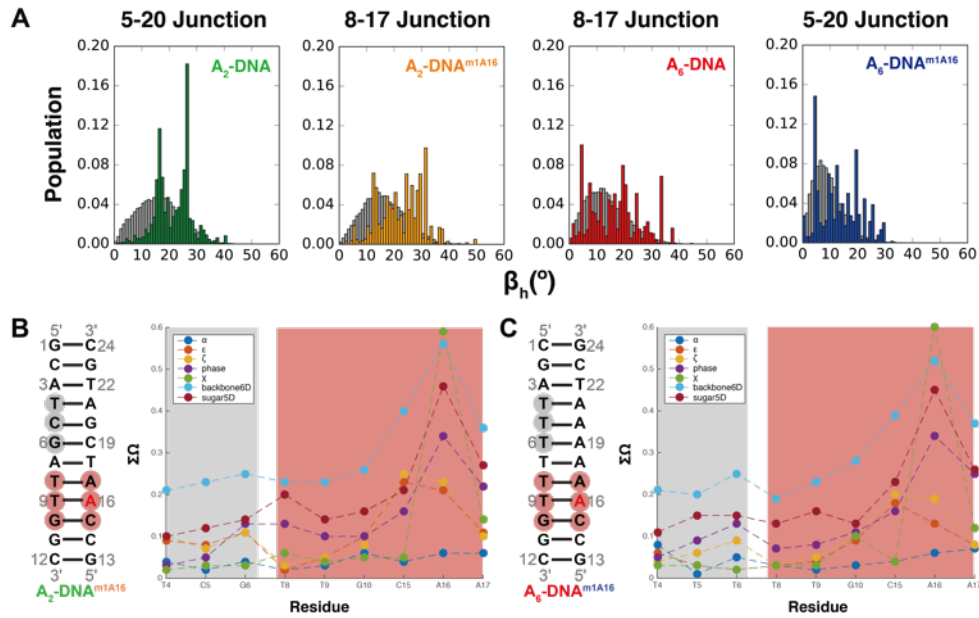

**Figure S7.** (A) Comparison of RDC-selected (in color) and MD (in gray) ensembles. Representative examples of local kink angle ( $\beta_n$ ) distribution at specific base pair junctions. (B, C) Analysis of similarity and differences between the dynamic ensembles of A<sub>2</sub>- and A<sub>6</sub>-DNA with and without m<sup>1</sup>A modification with REsemble (3).  $\Sigma\Omega$  quantifies the difference between two distributions (or multiple distributions in multi-dimensional analysis) and ranges between 1 and 0 for maximum difference and similarity, respectively. Shown are  $\Sigma\Omega$  values for 1D torsion angles ( $\alpha$ ,  $\epsilon$ ,  $\zeta$ ,  $\chi$ ), sugar phase angles, 5D sugar torsion angles ( $v_0$ - $v_4$ ) and 6D backbone torsion angles ( $\alpha$ ,  $\beta$ ,  $\gamma$ ,  $\delta$ ,  $\epsilon$ ,  $\zeta$ ) between ensembles of DNA with and without m<sup>1</sup>A to assess the local perturbations in m<sup>1</sup>AT HG bp and its flanking bps (in red).  $\Sigma\Omega$  values for local parameters at sites (in gray) > 2 bps away from m<sup>1</sup>A site defines differences expected purely due to uncertainty ( $\Sigma\Omega_{\text{control}}$ ) and larger  $\Sigma\Omega$  values are considered statistically significant. The largest deviations are in  $\chi$  ( $\Sigma\Omega$  in 0.6;  $\Sigma\Omega_{\text{control}} = 0.0$ ),  $\epsilon$  and  $\zeta$  ( $\Sigma\Omega$  in 0.0~0.3;  $\Sigma\Omega_{\text{control}} = 0.1$ ), sugar phase angle ( $\Sigma\Omega$  in 0.1~0.3;  $\Sigma\Omega_{\text{control}} = 0.1$ ), 6D-backbone torsion angle ( $\Sigma\Omega$  in 0.2~0.5;  $\Sigma\Omega_{\text{control}} = 0.2$ ) and 5D-sugar torsion angle ( $\Sigma\Omega$  in 0.1~0.5;  $\Sigma\Omega_{\text{control}} = 0.15$ ) of the residues in and flanking m<sup>1</sup>A•T HG bp.



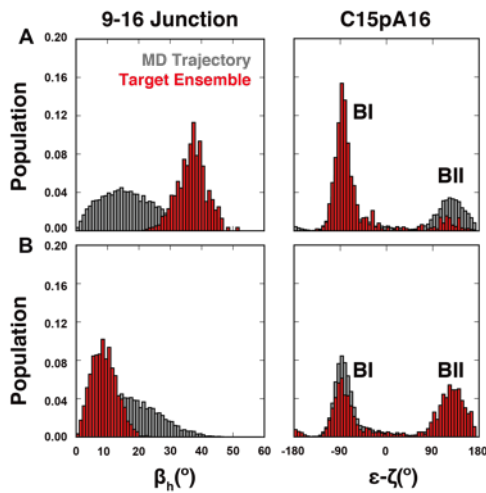

**Figure S8.** (A, B) Comparison of inter-helical kink angle and BI/BII distributions for the MD ensemble and a target ensemble from MD selected pool to have average kink angles (A)  $\beta_h = 37^\circ$  and (B)  $\beta_h = 9^\circ$  at the T9-A16 bp junction from  $A_2$ -DNA MD pool (average  $\beta_h = 17^\circ$ ).

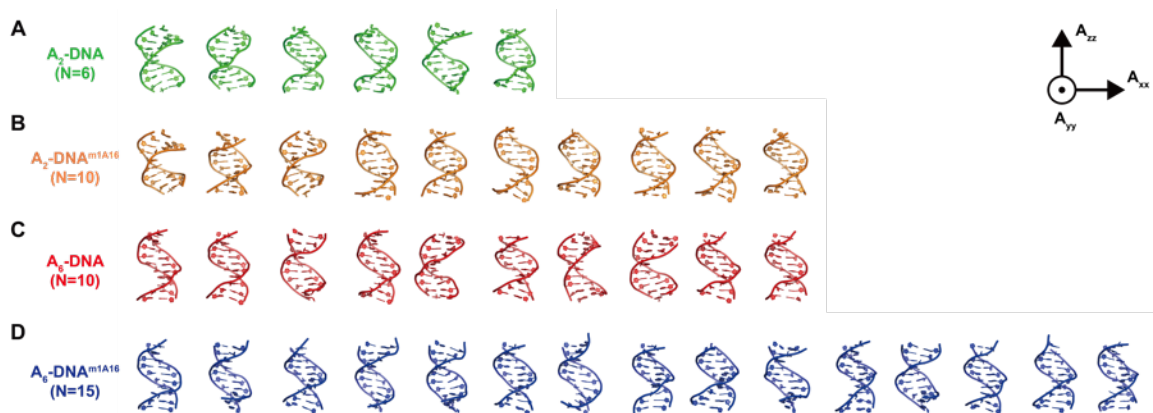

**Figure S9.** Principal axis of alignment tensor for each conformer in the ensembles of (A)  $A_2$ -DNA (green) (B)  $A_2$ -DNA<sup>m1A16</sup> (orange) (C)  $A_6$ -DNA (red) (D)  $A_6$ -DNA<sup>m1A16</sup> (blue), respectively.

**Table S1:** Structure statistics for A<sub>2</sub>-DNA, A<sub>2</sub>-DNA<sup>m1A16</sup>, A<sub>6</sub>-DNA and A<sub>6</sub>-DNA<sup>m1A16</sup>

|                                                              | A <sub>2</sub> -DNA | A <sub>2</sub> -DNA <sup>m1A16</sup> | A <sub>6</sub> -DNA | A <sub>6</sub> -DNA <sup>m1A16</sup> |
|--------------------------------------------------------------|---------------------|--------------------------------------|---------------------|--------------------------------------|
| Dihedral angle restraints                                    | 164                 | 164                                  | 164                 | 164                                  |
| H-bond restraints                                            | 72                  | 72                                   | 72                  | 72                                   |
| Base-pair planarity restraints                               | 26                  | 26                                   | 26                  | 26                                   |
| <b>NOE restraints</b>                                        |                     |                                      |                     |                                      |
| Total                                                        | 284                 | 255                                  | 251                 | 261                                  |
| Intra-residue                                                | 125                 | 106                                  | 144                 | 145                                  |
| Inter-residue                                                | 159                 | 142                                  | 107                 | 109                                  |
| m <sup>1</sup> A methyl group                                | 0                   | 7                                    | 0                   | 7                                    |
| <b>RDC restraints</b>                                        |                     |                                      |                     |                                      |
| Dihedral angle violations (> 6°)                             | 0                   | 0                                    | 0                   | 0                                    |
| NOE violations (> 0.40 Å)                                    | 0                   | 0                                    | 0                   | 0                                    |
| RDC RMSD (Hz)                                                | 1.8                 | 2.1                                  | 1.8                 | 1.9                                  |
| Heavy-atom RMSD range <sup>a</sup> (Å)                       | 0.08-0.32           | 0.16-0.53                            | 0.22-0.39           | 0.05-0.25                            |
| <b>ADIT<sup>b</sup> and Molprobit<sup>c</sup> Validation</b> |                     |                                      |                     |                                      |
| Close contacts                                               | None                |                                      |                     |                                      |
| RMSD for covalent bonds                                      | 0.009 Å             |                                      |                     |                                      |
| RMSD for covalent angles                                     | 1.4°                |                                      |                     |                                      |
| Clashscore, all atoms                                        | 1.32                | 7.86                                 | 6.57                | 1.31                                 |
| Bad bonds                                                    | 0/539               | 0/539                                | 0/537               | 0/537                                |
| Bad angles                                                   | 0/826               | 0/826                                | 0/822               | 0/822                                |
| PDB ID                                                       | 5UZD                | --                                   | 5UZF                | 5UZI                                 |
| BMRB ID                                                      | 30253               | --                                   | 30254               | 30255                                |

a – Heavy-atom RMSD calculated with respect to mean structure, excluding terminal end bps

b – ADIT NMR: <http://deposit.pdb.org/validate/>

c – MOLPROBITY <http://molprobit.biochem.duke.edu/>

**Table S2:** Chemical shifts and perturbations upon N1-methylation of A16 in A<sub>6</sub>- and A<sub>2</sub>-DNA constructs.**Chemical shifts of A<sub>6</sub>-DNA<sup>m1A16</sup>**

| A <sub>6</sub> -DN<br>A <sup>m1A16</sup> | C1'  | H1'  | C2'  | H2'  | H2'' | C4'  | H4'  | P     | C6/C8 | H6/<br>H8 | N1/C2/<br>N3/C5 | H1/H2/<br>H3/H5 | C7   | H7   |
|------------------------------------------|------|------|------|------|------|------|------|-------|-------|-----------|-----------------|-----------------|------|------|
| C1                                       | 87.9 | 5.66 | 39.9 | 2.32 | 1.79 | 88.3 | 4.01 |       | 143.1 | 7.56      | 99.8            | 5.85            |      |      |
| G2                                       | 84.0 | 5.49 | 40.0 | 2.78 | 2.68 | 87.4 | 4.29 | -0.39 | 138.2 | 7.92      | 147.3           | 12.81           |      |      |
| A3                                       | 85.0 | 6.30 | 41.3 | 2.96 | 2.67 | 87.8 | 4.48 | -0.45 | 141.5 | 8.24      | 155.0           | 7.83            |      |      |
| T4                                       | 85.0 | 5.94 | 39.1 | 2.59 | 2.04 | 85.4 | 4.21 | -0.85 | 138.4 | 7.15      | 159.2           | 13.76           | 14.0 | 1.33 |
| T5                                       | 85.3 | 6.16 | 39.0 | 2.64 | 2.23 | 85.9 | 4.23 | -0.77 | 140.2 | 7.42      | 159.8           | 14.04           | 14.4 | 1.51 |
| T6                                       | 85.2 | 6.16 | 39.0 | 2.65 | 2.23 | 86.0 | 4.21 | -0.84 | 140.3 | 7.43      | 159.8           | 13.95           | 14.4 | 1.58 |
| T7                                       | 85.1 | 6.11 | 39.0 | 2.65 | 2.18 | 86.0 | 4.22 | -0.70 | 140.2 | 7.44      | 159.3           | 13.68           | 14.4 | 1.57 |
| T8                                       | 85.1 | 6.07 | 38.9 | 2.57 | 2.16 | 86.1 | 4.21 | -0.67 | 140.4 | 7.45      | 159.1           | 13.70           | 14.5 | 1.63 |
| <b>T9</b>                                | 85.1 | 5.74 | 39.4 | 2.15 | 1.57 | 84.8 | 3.98 | -0.80 | 140.0 | 7.15      | 156.4           | 11.77           | 14.7 | 1.66 |
| G10                                      | 84.3 | 5.54 | 39.4 | 2.72 |      | 87.5 | 4.32 | -0.65 | 138.8 | 7.91      | 147.2           | 12.89           |      |      |
| G11                                      | 84.8 | 5.94 | 41.2 | 2.67 | 2.49 | 86.9 | 4.33 | -0.37 | 137.5 | 7.70      | 147.2           | 13.02           |      |      |
| C12                                      | 86.5 | 6.14 | 41.6 | 2.14 |      | 86.6 | 3.99 | -0.41 | 143.2 | 7.41      | 98.4            | 5.39            |      |      |
| G13                                      | 85.5 | 5.97 | 40.5 | 2.74 | 2.64 | 89.0 | 4.21 |       | 138.8 | 7.95      |                 |                 |      |      |
| C14                                      | 86.7 | 5.98 | 40.0 | 2.40 | 2.11 | 86.1 | 4.22 | -0.66 | 142.8 | 7.46      | 98.7            | 5.35            |      |      |
| C15                                      | 86.0 | 5.78 | 39.3 | 2.39 | 1.72 | 86.2 | 4.12 | -0.55 | 143.4 | 7.35      | 98.2            | 5.54            |      |      |
| <b>m1A16</b>                             | 88.1 | 5.58 | 39.1 | 2.25 | 2.02 | 86.4 | 4.02 |       | 147.1 | 7.48      | 149.8           | 8.42            |      |      |
| A17                                      | 84.6 | 5.54 | 41.1 | 2.76 |      | 87.2 | 4.34 |       | 141.9 | 8.19      | 154.1           | 7.11            |      |      |
| A18                                      | 84.4 | 5.72 | 41.2 | 2.76 | 2.48 | 87.2 | 4.34 | -0.64 | 140.9 | 7.98      | 153.6           | 6.89            |      |      |
| A19                                      | 84.3 | 5.80 | 41.6 | 2.85 | 2.45 | 87.1 | 4.37 | -0.72 | 140.9 | 7.92      | 153.4           | 6.88            |      |      |
| A20                                      | 84.1 | 5.87 | 41.9 | 2.88 | 2.48 | 86.9 | 4.41 | -0.76 | 140.8 | 7.88      | 153.3           | 6.96            |      |      |
| A21                                      | 84.7 | 6.05 | 41.9 | 2.86 | 2.42 | 86.8 | 4.42 | -0.68 | 141.0 | 7.94      | 154.5           | 7.60            |      |      |
| T22                                      | 84.9 | 5.88 | 39.5 | 2.41 | 1.92 | 85.1 | 4.17 | -0.76 | 138.5 | 7.02      | 159.3           | 13.61           | 13.9 | 1.16 |
| C23                                      | 86.4 | 5.70 | 39.5 | 2.35 | 1.96 | 85.5 | 4.10 | -0.57 | 143.8 | 7.41      | 98.8            | 5.57            |      |      |
| G24                                      | 84.7 | 6.14 | 41.9 | 2.59 | 2.34 | 88.1 | 4.16 | -0.21 | 139.3 | 7.91      |                 |                 |      |      |

Chemical shifts are referenced to 50  $\mu$ M DSS and 85% H<sub>3</sub>PO<sub>4</sub> for <sup>1</sup>H and <sup>31</sup>P (see methods).

### Chemical shifts perturbations upon single m<sup>1</sup>A incorporation in A<sub>6</sub>-DNA

Measured as the difference in chemical shift observed for A<sub>6</sub>-DNA<sup>m<sup>1</sup>A<sup>16</sup></sup> and A<sub>6</sub>-DNA (positive and negative values indicate down-/up-field shifts).

| Perturbation | C1'  | C2'  | C4'  | C6/<br>C8 | N1/C2/<br>N3/C5 | C7  | P     | H1'   | H2'   | H2''  | H4'   | H6/H8 | H1/H2/<br>H3/H5 | H7    |
|--------------|------|------|------|-----------|-----------------|-----|-------|-------|-------|-------|-------|-------|-----------------|-------|
| C1           | 0.0  | 0.0  | 0.0  | 0.0       | 0.0             |     |       | -0.01 | 0.00  | -0.01 | 0.00  | 0.00  | -0.01           |       |
| G2           | 0.0  | 0.0  | 0.0  | 0.0       | 0.0             |     | 0.00  | 0.00  | 0.00  | -0.01 | 0.00  | 0.00  | 0.00            |       |
| A3           | 0.0  | 0.0  | 0.0  | 0.0       | 0.0             |     | 0.00  | 0.00  | -0.01 | -0.01 | 0.00  | 0.00  | 0.00            |       |
| T4           | 0.0  | 0.0  | 0.0  | 0.0       | 0.0             | 0.0 | 0.01  | 0.00  | -0.01 | 0.01  | 0.00  | 0.00  | -0.01           | 0.00  |
| T5           | 0.1  | 0.0  | 0.0  | 0.0       | 0.0             | 0.0 | 0.01  | -0.01 | -0.01 | 0.00  | -0.01 | 0.00  | -0.02           | 0.00  |
| T6           | 0.0  | 0.0  | 0.0  | 0.0       | -0.1            | 0.0 | 0.00  | -0.01 | 0.01  | 0.01  | 0.00  | 0.00  | -0.04           | 0.01  |
| T7           | 0.0  | 0.0  | 0.0  | 0.0       | -0.2            | 0.0 | 0.03  | -0.02 | -0.02 | -0.02 | -0.01 | 0.01  | -0.15           | 0.01  |
| T8           | -0.1 | 0.0  | 0.3  | 0.2       | -0.2            | 0.0 | 0.03  | 0.01  | -0.02 | 0.05  | 0.02  | 0.03  | -0.07           | -0.02 |
| <b>T9</b>    | 0.1  | 0.4  | -0.5 | 0.4       | -2.7            | 0.1 | -0.10 | 0.00  | -0.21 | -0.40 | -0.10 | -0.07 | -1.97           | -0.02 |
| G10          | 0.0  | -0.8 | -0.2 | 0.3       | 0.1             |     | -0.17 | -0.03 | 0.05  |       | 0.00  | 0.07  | 0.05            |       |
| G11          | 0.1  | 0.1  | 0.0  | 0.0       | -0.2            |     | -0.15 | 0.00  | -0.02 | -0.02 | -0.01 | -0.03 | -0.04           |       |
| C12          | 0.0  | 0.0  | 0.0  | 0.0       | 0.0             |     | 0.00  | -0.01 | 0.00  |       | 0.00  | 0.00  | -0.03           |       |
| G13          | 0.2  | 0.1  | -0.1 | 0.0       |                 |     |       | 0.00  | -0.01 | 0.02  | 0.00  | 0.00  |                 |       |
| C14          | 0.0  | 0.3  | 0.0  | 0.0       | -0.2            |     | -0.04 | -0.04 | -0.03 | 0.03  | 0.01  | 0.02  | -0.02           |       |
| C15          | -0.3 | 0.0  | 0.5  | 0.2       | -0.7            |     | -0.01 | 0.54  | 0.20  | -0.18 | 0.11  | -0.06 | -0.08           |       |
| <b>A16</b>   | 3.6  | -1.0 | -0.7 | 5.6       | -4.5            |     |       | -0.10 | -0.50 | -0.65 | -0.30 | -0.67 | 1.24            |       |
| A17          | 0.6  | 0.3  | 0.1  | 1.0       | 0.5             |     |       | -0.12 | 0.04  |       | 0.00  | 0.16  | 0.16            |       |
| A18          | 0.2  | -0.1 | 0.1  | 0.0       | 0.1             |     | 0.01  | 0.01  | -0.01 | 0.02  | -0.01 | 0.05  | 0.02            |       |
| A19          | 0.1  | -0.1 | 0.0  | 0.1       | 0.0             |     | 0.02  | 0.01  | -0.01 | 0.01  | 0.01  | 0.04  | 0.00            |       |
| A20          | 0.0  | -0.1 | 0.0  | 0.0       | 0.0             |     | 0.02  | 0.00  | 0.00  | 0.02  | 0.00  | 0.02  | 0.00            |       |
| A21          | 0.0  | 0.0  | 0.0  | 0.0       | 0.0             |     | 0.02  | -0.01 | 0.00  | -0.01 | 0.00  | 0.00  | -0.01           |       |
| T22          | 0.0  | 0.0  | 0.0  | 0.0       | 0.0             | 0.0 | 0.00  | -0.01 | -0.01 | 0.00  | -0.01 | 0.00  | 0.00            | 0.00  |
| C23          | 0.0  | 0.0  | 0.0  | 0.0       | 0.0             |     | 0.00  | -0.01 | -0.01 | -0.01 | 0.00  | 0.00  | -0.01           |       |
| G24          | 0.0  | 0.0  | 0.0  | 0.0       |                 |     | 0.00  | -0.01 | 0.00  | -0.01 | 0.00  | 0.00  |                 |       |

Chemical shifts of A<sub>2</sub>-DNA<sup>m1A16</sup>

| A <sub>2</sub> -DNA<br>m1A16 | C1'  | H1'  | C2'  | H2'  | H2'' | C4'  | H4'  | P     | C6/C8 | H6/H8 | N1/C2/<br>N3/C5 | H1/H2/<br>H3/H5 | C7   | H7#  |
|------------------------------|------|------|------|------|------|------|------|-------|-------|-------|-----------------|-----------------|------|------|
| G1                           | 85.4 | 5.96 | 40.4 | 2.73 | 2.62 | 89.0 | 4.20 |       | 138.8 | 7.93  |                 |                 |      |      |
| C2                           | 86.3 | 5.64 | 39.7 | 2.46 | 2.15 | 85.9 | 4.19 | -0.69 | 142.8 | 7.44  | 98.5            | 5.42            |      |      |
| A3                           | 85.2 | 6.27 | 40.8 | 2.94 | 2.68 | 87.7 | 4.41 | -0.34 | 141.8 | 8.32  | 154.5           | 7.68            |      |      |
| T4                           | 85.0 | 5.84 | 39.1 | 2.39 | 1.97 | 85.1 | 4.14 | -0.86 | 138.3 | 7.11  | 159.0           | 13.50           | 14.2 | 1.37 |
| C5                           | 86.4 | 5.53 | 39.6 | 2.31 | 1.92 | 85.4 | 4.05 | -0.62 | 143.5 | 7.34  | 98.7            | 5.49            |      |      |
| G6                           | 83.9 | 5.61 | 40.5 | 2.76 | 2.64 | 87.4 | 4.31 | -0.46 | 138.2 | 7.83  | 146.9           | 12.48           |      |      |
| A7                           | 85.0 | 6.16 | 41.6 | 2.87 | 2.56 | 87.4 | 4.41 | -0.71 | 141.2 | 8.09  | 154.6           | 7.67            |      |      |
| T8                           | 85.1 | 5.86 | 39.2 | 2.46 | 1.94 | 85.5 | 4.15 | -0.83 | 138.3 | 7.11  | <b>158.7</b>    | <b>13.46</b>    | 14.1 | 1.33 |
| <b>T9</b>                    | 85.4 | 5.75 | 39.5 | 2.15 | 1.59 | 85.1 | 3.98 | -0.97 | 139.7 | 7.12  | <b>156.3</b>    | <b>11.60</b>    | 14.6 | 1.56 |
| G10                          | 84.2 | 5.54 | 39.5 | 2.70 |      | 87.2 | 4.30 | -0.71 | 138.7 | 7.88  | 147.4           | 12.86           |      |      |
| G11                          | 84.8 | 5.94 | 41.1 | 2.67 | 2.49 | 86.8 | 4.34 | -0.43 | 137.5 | 7.69  | 147.4           | 13.02           |      |      |
| C12                          | 86.5 | 6.15 | 41.6 | 2.14 |      | 86.6 | 4.00 | -0.47 | 143.2 | 7.40  | 98.4            | 5.38            |      |      |
| G13                          | 85.2 | 5.95 | 40.1 | 2.75 | 2.58 | 89.1 | 4.20 |       | 138.7 | 7.92  |                 |                 |      |      |
| C14                          | 86.6 | 5.97 | 39.9 | 2.39 | 2.10 | 86.0 | 4.21 | -0.72 | 142.8 | 7.44  | 98.7            | 5.33            |      |      |
| C15                          | 86.1 | 5.84 | 39.3 | 2.49 | 1.79 | 86.2 | 4.15 | -0.59 | 143.4 | 7.37  | 98.1            | 5.52            |      |      |
| <b>m1A16</b>                 | 88.3 | 5.74 |      |      |      | 86.5 | 4.14 |       | 147.1 | 7.58  | 149.8           | 8.44            |      |      |
| A17                          | 84.7 | 6.11 |      |      |      | 86.9 | 4.42 |       | 140.9 | 8.11  | 154.5           | 7.58            |      |      |
| T18                          | 85.4 | 5.79 |      |      |      | 85.4 | 4.14 | -0.89 | 138.5 | 7.11  | 159.0           | 13.50           | 14.2 | 1.33 |
| C19                          | 86.5 | 5.60 | 39.9 | 2.32 | 1.89 | 85.5 | 4.05 | -0.64 | 143.5 | 7.34  | 98.7            | 5.48            |      |      |
| G20                          | 83.9 | 5.57 | 40.5 | 2.75 | 2.64 | 87.2 | 4.30 | -0.54 | 138.2 | 7.83  | 146.9           | 12.51           |      |      |
| A21                          | 85.0 | 6.16 | 41.4 | 2.86 | 2.56 | 87.3 | 4.40 | -0.65 | 141.1 | 8.12  | 154.7           | 7.70            |      |      |
| T22                          | 84.9 | 5.70 | 39.5 | 2.31 | 1.89 | 85.0 | 4.08 | -0.82 | 138.0 | 7.01  | 159.0           | 13.50           | 14.2 | 1.34 |
| G23                          | 84.5 | 5.88 | 40.5 | 2.66 | 2.55 | 86.9 | 4.31 | -0.63 | 138.2 | 7.81  | 147.7           | 12.74           |      |      |
| C24                          | 86.6 | 6.15 | 41.6 | 2.14 |      | 86.7 | 4.02 | -0.37 | 143.3 | 7.43  | 98.5            | 5.42            |      |      |

Chemical shifts of T8/T9 N3/H3 were measured at 5 °C as they were exchange broadened at 25 °C.

### Chemical shifts perturbations upon single m<sup>1</sup>A incorporation in A<sub>2</sub>-DNA

Measured as the difference in chemical shift observed for A<sub>2</sub>-DNA<sup>m<sup>1</sup>A<sub>16</sub></sup> and A<sub>2</sub>-DNA (positive and negative values indicate down-/up-field shifts).

| Perturbation | C1'  | C2'  | C4'  | C6/C8 | N1/C2/<br>N3/C5 | C7  | P     | H1'   | H2'   | H2''  | H4'   | H6/H8 | H1/H2/<br>H3/H5 | H7   |
|--------------|------|------|------|-------|-----------------|-----|-------|-------|-------|-------|-------|-------|-----------------|------|
| G1           | 0.1  | 0.1  | -0.1 | 0.0   |                 |     |       | 0.00  | -0.01 | 0.02  | 0.00  | 0.00  |                 |      |
| C2           | 0.0  | 0.0  | -0.1 | 0.0   | -0.1            |     | -0.08 | -0.01 | 0.00  | -0.01 | -0.01 | 0.00  | -0.01           |      |
| A3           | 0.0  | 0.0  | 0.0  | 0.0   | 0.0             |     | -0.08 | -0.01 | -0.01 | -0.01 | -0.01 | 0.00  | 0.00            |      |
| T4           | 0.0  | 0.0  | 0.0  | 0.0   | 0.1             | 0.0 | -0.08 | -0.01 | 0.00  | 0.00  | 0.00  | 0.00  | 0.00            | 0.00 |
| C5           | 0.0  | 0.0  | -0.1 | 0.0   | -0.1            |     | -0.09 | 0.00  | -0.01 | 0.00  | 0.00  | 0.00  | -0.02           |      |
| G6           | 0.0  | 0.0  | 0.2  | 0.0   | 0.0             |     | -0.09 | 0.00  | -0.01 | -0.01 | 0.00  | -0.01 | -0.01           |      |
| A7           | 0.0  | 0.0  | -0.1 | 0.0   | 0.0             |     | -0.04 | -0.01 | -0.02 | -0.03 | -0.01 | -0.02 | 0.02            |      |
| T8           | 0.0  | 0.1  | 0.3  | 0.0   | -0.4            | 0.1 | -0.06 | 0.00  | 0.00  | 0.03  | 0.02  | 0.02  | -0.17           | 0.06 |
| <b>T9</b>    | 0.1  | 0.4  | -0.4 | 0.2   | -2.9            | 0.1 | -0.19 | 0.01  | -0.20 | -0.39 | -0.09 | -0.09 | -2.15           | 0.01 |
| G10          | 0.1  | -0.7 | 0.1  | 0.2   | 0.2             |     | -0.22 | -0.04 | 0.01  |       | -0.02 | 0.08  | 0.05            |      |
| G11          | 0.0  | 0.1  | 0.0  | 0.0   | -0.1            |     | -0.19 | 0.01  | -0.01 | -0.02 | -0.01 | -0.02 | -0.04           |      |
| C12          | 0.0  | 0.0  | 0.0  | 0.0   | 0.0             |     | -0.08 | 0.00  | 0.00  |       | 0.00  | 0.00  | -0.03           |      |
| G13          | 0.0  | 0.0  | 0.0  | 0.0   |                 |     |       | -0.01 | -0.01 | -0.01 | -0.01 | 0.00  |                 |      |
| C14          | -0.1 | 0.2  | 0.0  | 0.0   | -0.2            |     | -0.11 | -0.05 | -0.04 | 0.00  | 0.00  | 0.01  | -0.03           |      |
| C15          | -0.3 | -0.1 | 0.7  | 0.2   | -0.8            |     | -0.06 | 0.51  | 0.18  | -0.20 | 0.09  | -0.05 | -0.08           |      |
| <b>A16</b>   | 3.6  |      | -1.2 | 5.6   | -4.1            |     |       | -0.19 |       |       | -0.25 | -0.65 | 1.25            |      |
| A17          | 0.0  |      | -0.1 | -0.1  | 0.0             |     |       | -0.02 |       |       | -0.01 | -0.02 | 0.00            |      |
| T18          | 0.4  |      | 0.2  | 0.3   | -0.1            | 0.1 | -0.11 | 0.02  |       |       | 0.02  | 0.10  | 0.03            | 0.06 |
| C19          | 0.1  | 0.1  | -0.2 | 0.0   | 0.0             |     | -0.06 | 0.01  | 0.00  | -0.02 | 0.00  | 0.03  | 0.02            |      |
| G20          | 0.0  | 0.0  | 0.0  | 0.0   | 0.0             |     | -0.10 | 0.00  | 0.00  | 0.00  | 0.00  | 0.00  | -0.01           |      |
| A21          | 0.1  | 0.0  | -0.1 | 0.0   | 0.0             |     | -0.09 | -0.01 | -0.01 | -0.01 | -0.01 | 0.00  | 0.00            |      |
| T22          | 0.0  | 0.0  | 0.0  | 0.0   | 0.0             | 0.0 | -0.08 | -0.01 | -0.01 | -0.01 | -0.01 | 0.00  | 0.00            | 0.00 |
| G23          | 0.0  | 0.0  | 0.0  | 0.0   | 0.0             |     | -0.08 | -0.01 | 0.00  | -0.01 | -0.01 | 0.00  | 0.00            |      |
| C24          | 0.0  | 0.0  | 0.0  | 0.0   | 0.0             |     | -0.08 | -0.01 | -0.01 |       | -0.01 | 0.00  | -0.01           |      |

**Table S3:** 3-bond scalar couplings (in Hz) measured between H1' and H2'/H2'' from 2D [<sup>1</sup>H, <sup>1</sup>H] DQF-COSY spectra for A<sub>6</sub>- and A<sub>6</sub>-DNA<sup>m1A16</sup> constructs. Empty cells denote lack of measurement due to resonance overlap.

| Residue | H1'-H2''            |                                      | H1'-H2'             |                                      |
|---------|---------------------|--------------------------------------|---------------------|--------------------------------------|
|         | A <sub>6</sub> -DNA | A <sub>6</sub> -DNA <sup>m1A16</sup> | A <sub>6</sub> -DNA | A <sub>6</sub> -DNA <sup>m1A16</sup> |
| C1      | 8.1                 | 8.0                                  | 6.3                 | 6.3                                  |
| G2      |                     |                                      | 6.3                 | 6.6                                  |
| A3      | 8.7                 | 8.6                                  | 6.7                 | 6.8                                  |
| T4      |                     | 9.0                                  | 6.6                 | 6.5                                  |
| T5      |                     |                                      | 6.6                 |                                      |
| T6      |                     |                                      |                     | 7.2                                  |
| T7      | 8.7                 |                                      | 6.4                 |                                      |
| T8      | 8.7                 | 8.9                                  | 6.3                 | 6.9                                  |
| T9      |                     | 7.6                                  |                     | 7.3                                  |
| G10     |                     |                                      | 7.6                 | 7.6                                  |
| G11     | 8.4                 | 8.2                                  | 6.6                 | 6.6                                  |
| C12     |                     |                                      | 7.5                 | 7.8                                  |
| G13     | 8.4                 | 8.2                                  | 6.6                 | 7.0                                  |
| C14     | 8.1                 | 8.4                                  | 6.3                 | 6.3                                  |
| C15     |                     | 9.2                                  | 6.7                 | 6.5                                  |
| A16     |                     | 8.0                                  | 6.6                 |                                      |
| A17     |                     |                                      | 6.6                 |                                      |
| A18     |                     |                                      | 7.2                 |                                      |
| A19     | 9.1                 | 9.7                                  | 6.6                 | 7.1                                  |
| A20     | 9.3                 | 9.5                                  | 6.6                 | 6.7                                  |
| A21     | 8.7                 | 8.7                                  | 6.3                 | 6.5                                  |
| T22     | 8.4                 | 8.7                                  | 6.6                 | 6.7                                  |
| C23     | 9.1                 | 8.3                                  |                     | 6.3                                  |
| G24     | 6.9                 | 6.8                                  | 7.8                 | 7.8                                  |

**Table S4.** Robustness of local kinking angles ( $\beta_h$ ) with various ensemble size (N).

|                                          |      | 4-21 |     | 5-20 |     | 6-19 |      | 7-18 |      | 8-17 |     | 9-16        |             |
|------------------------------------------|------|------|-----|------|-----|------|------|------|------|------|-----|-------------|-------------|
| Size                                     | RMSD | Avg  | Std | Avg  | Std | Avg  | Std  | Avg  | Std  | Avg  | Std | Avg         | Std         |
| <b>A<sub>2</sub>-DNA</b>                 |      |      |     |      |     |      |      |      |      |      |     |             |             |
| 10                                       | 1.8  | 22.1 | 7.4 | 23.2 | 5.9 | 21.2 | 9.6  | 18.8 | 8.7  | 19.7 | 7.1 | <b>19.1</b> | <b>8.1</b>  |
| 20                                       | 1.23 | 20.1 | 7.6 | 22.7 | 7.1 | 22.7 | 7.9  | 21.2 | 9.4  | 20.5 | 7.9 | <b>20.1</b> | <b>9.2</b>  |
| 30                                       | 1.01 | 22.2 | 8.3 | 22.6 | 7.8 | 22.4 | 9.5  | 22.5 | 10.4 | 20.3 | 9.2 | <b>18.5</b> | <b>10.1</b> |
| 50                                       | 0.97 | 20.9 | 8.2 | 22.8 | 7.8 | 22.8 | 9.3  | 22.5 | 9.9  | 21.6 | 7.9 | <b>19.6</b> | <b>9.1</b>  |
| 80                                       | 1.11 | 20.7 | 8.3 | 22.9 | 7.5 | 23.0 | 9.2  | 21.4 | 10.5 | 20.0 | 9.0 | <b>18.8</b> | <b>9.8</b>  |
| 100                                      | 1.2  | 21.0 | 7.9 | 22.5 | 7.5 | 22.5 | 9.1  | 21.0 | 10.1 | 20.3 | 8.6 | <b>18.7</b> | <b>9.4</b>  |
| 150                                      | 1.41 | 20.9 | 8.1 | 22.0 | 7.4 | 22.2 | 9.0  | 20.9 | 9.9  | 19.7 | 8.8 | <b>18.7</b> | <b>9.2</b>  |
| 200                                      | 1.58 | 21.3 | 7.7 | 21.9 | 7.5 | 22.2 | 8.5  | 20.6 | 9.6  | 19.6 | 8.8 | <b>18.3</b> | <b>9.1</b>  |
| 300                                      | 1.86 | 21.6 | 7.6 | 21.6 | 7.5 | 21.7 | 8.3  | 20.3 | 9.3  | 19.8 | 8.6 | <b>18.4</b> | <b>9.1</b>  |
| 400                                      | 2.08 | 21.5 | 7.9 | 21.5 | 7.4 | 21.8 | 8.3  | 20.2 | 9.1  | 19.7 | 8.6 | <b>18.4</b> | <b>9.0</b>  |
| 500                                      | 2.25 | 21.3 | 7.8 | 21.2 | 7.5 | 21.4 | 8.3  | 19.8 | 9.1  | 19.4 | 8.5 | <b>18.3</b> | <b>9.2</b>  |
| 800                                      | 2.66 | 21.3 | 8.2 | 21.1 | 7.6 | 21.3 | 8.3  | 19.3 | 8.9  | 18.9 | 8.5 | <b>17.9</b> | <b>8.9</b>  |
| 1000                                     | 2.88 | 21.1 | 8.2 | 20.9 | 7.6 | 21.1 | 8.1  | 19   | 8.6  | 18.4 | 8.4 | <b>17.8</b> | <b>9.0</b>  |
| 1500                                     | 3.29 | 21   | 8.2 | 20.6 | 7.7 | 20.6 | 8.1  | 18.3 | 8.4  | 17.9 | 8.4 | <b>17.5</b> | <b>8.9</b>  |
| 2000                                     | 3.62 | 20.9 | 8.2 | 20.5 | 7.6 | 20.4 | 8.0  | 18   | 8.3  | 17.5 | 8.4 | <b>17.5</b> | <b>8.9</b>  |
| <b>A<sub>2</sub>-DNA<sup>m1A16</sup></b> |      |      |     |      |     |      |      |      |      |      |     |             |             |
| 10                                       | 2.43 | 21.3 | 7.0 | 22.1 | 5.8 | 19.2 | 10.3 | 17.5 | 12.5 | 21.8 | 7.1 | <b>24.9</b> | <b>8.3</b>  |
| 20                                       | 1.69 | 23.8 | 7.1 | 21.2 | 6.5 | 17.6 | 6.4  | 16.8 | 8.7  | 22.3 | 7.4 | <b>26.3</b> | <b>8</b>    |
| 30                                       | 1.73 | 20.9 | 8.3 | 20.7 | 8.9 | 20.2 | 7    | 19.1 | 9.3  | 22.3 | 9.2 | <b>25.4</b> | <b>9.9</b>  |
| 50                                       | 1.61 | 22.3 | 7.8 | 21.2 | 8   | 18.8 | 8.1  | 18.7 | 9.4  | 22.7 | 8.5 | <b>26</b>   | <b>8.3</b>  |
| 80                                       | 1.73 | 22.2 | 8.3 | 20.9 | 8.4 | 19.5 | 8.7  | 19.4 | 9.6  | 22.7 | 9.3 | <b>25.6</b> | <b>8.9</b>  |
| 100                                      | 1.82 | 22.1 | 8.6 | 21   | 8.3 | 19.6 | 8.5  | 19.2 | 9.7  | 22.5 | 8.9 | <b>25.7</b> | <b>8.3</b>  |
| 150                                      | 2    | 22.1 | 8.1 | 20.7 | 8.2 | 19.6 | 8.5  | 18.7 | 9.4  | 22.2 | 8.8 | <b>25.5</b> | <b>8.7</b>  |
| 200                                      | 2.17 | 21.8 | 8.3 | 20.8 | 8.2 | 19.6 | 8.2  | 18.4 | 9.1  | 21.8 | 9   | <b>25.2</b> | <b>8.7</b>  |
| 300                                      | 2.44 | 21.4 | 8.1 | 20.5 | 7.9 | 19.4 | 8.1  | 18.3 | 9    | 21.8 | 8.5 | <b>24.8</b> | <b>8.7</b>  |
| 400                                      | 2.66 | 21   | 8.1 | 20.5 | 8.1 | 19.2 | 8.3  | 18.1 | 8.8  | 21.3 | 8.4 | <b>24.5</b> | <b>8.7</b>  |
| 500                                      | 2.85 | 21.2 | 7.9 | 20.6 | 8   | 19.2 | 8.1  | 18.1 | 8.7  | 21.3 | 8.2 | <b>24.5</b> | <b>8.7</b>  |
| 800                                      | 3.27 | 21   | 7.9 | 20.5 | 7.9 | 19.2 | 8.2  | 17.8 | 8.6  | 20.9 | 8.3 | <b>24.2</b> | <b>8.6</b>  |
| 1000                                     | 3.5  | 21   | 8   | 20.4 | 7.9 | 19.1 | 8.2  | 17.6 | 8.6  | 20.6 | 8.1 | <b>24.1</b> | <b>8.5</b>  |
| 1500                                     | 3.95 | 20.7 | 7.9 | 20.3 | 7.9 | 19   | 8.2  | 17.3 | 8.4  | 20.1 | 8.2 | <b>23.9</b> | <b>8.5</b>  |
| 2000                                     | 4.32 | 20.6 | 7.9 | 20   | 7.8 | 18.7 | 8.2  | 17.2 | 8.4  | 19.8 | 8.2 | <b>23.7</b> | <b>8.6</b>  |



| A <sub>6</sub> -DNA                  |      |      |     |      |     |      |     |      |      |      |     |             |             |
|--------------------------------------|------|------|-----|------|-----|------|-----|------|------|------|-----|-------------|-------------|
| 10                                   | 2.45 | 9.6  | 6.8 | 8.5  | 7.9 | 11.4 | 8.6 | 12.1 | 9.1  | 15.1 | 9.6 | <b>14.1</b> | <b>7.7</b>  |
| 20                                   | 1.64 | 10.9 | 7.2 | 9.7  | 5.8 | 12.2 | 5.7 | 12.7 | 7.4  | 15.5 | 8.9 | <b>16.4</b> | <b>8.8</b>  |
| 30                                   | 1.62 | 11.2 | 7.1 | 10.3 | 6.3 | 11.9 | 7.8 | 13.5 | 10.1 | 18   | 9.3 | <b>16.6</b> | <b>7.3</b>  |
| 50                                   | 1.64 | 11.7 | 7.1 | 11.1 | 6.9 | 12.1 | 7.2 | 13.5 | 8.4  | 17.5 | 8.3 | <b>16.3</b> | <b>8.5</b>  |
| 80                                   | 1.78 | 11.4 | 7.4 | 10.8 | 7.4 | 11.8 | 7.2 | 13.1 | 8.3  | 17.4 | 9.4 | <b>16.5</b> | <b>8.3</b>  |
| 100                                  | 1.85 | 11.4 | 7   | 10.9 | 6.7 | 12   | 7.2 | 12.8 | 8.1  | 17.1 | 9.1 | <b>16.2</b> | <b>8.8</b>  |
| 150                                  | 2.09 | 11.5 | 7.3 | 10.9 | 7   | 12.3 | 7.5 | 13.1 | 8.1  | 16.7 | 8.6 | <b>15.9</b> | <b>8.8</b>  |
| 200                                  | 2.28 | 11.8 | 7.4 | 11.1 | 7.4 | 12.5 | 7.7 | 13.6 | 8    | 16.8 | 8.4 | <b>16</b>   | <b>8.9</b>  |
| 300                                  | 2.59 | 11.9 | 7   | 11.5 | 7.2 | 12.6 | 7.7 | 13.6 | 7.8  | 16.6 | 8.6 | <b>15.9</b> | <b>9</b>    |
| 400                                  | 2.84 | 11.8 | 7   | 11.4 | 7.1 | 12.4 | 7.3 | 13.2 | 7.7  | 16.1 | 8.8 | <b>15.9</b> | <b>8.9</b>  |
| 500                                  | 3.06 | 11.6 | 7   | 11.3 | 7.2 | 12.4 | 7.4 | 13.1 | 7.6  | 15.8 | 8.6 | <b>16</b>   | <b>8.8</b>  |
| 800                                  | 3.55 | 11.4 | 6.8 | 11   | 6.9 | 12   | 7.1 | 12.8 | 7.4  | 15.5 | 8.4 | <b>15.6</b> | <b>8.7</b>  |
| 1000                                 | 3.81 | 11.2 | 6.6 | 10.8 | 6.8 | 11.9 | 6.9 | 12.7 | 7.2  | 15.3 | 8.3 | <b>15.5</b> | <b>8.5</b>  |
| 1500                                 | 4.29 | 10.9 | 6.6 | 10.6 | 6.7 | 11.6 | 6.8 | 12.3 | 7.1  | 14.8 | 8.1 | <b>15.2</b> | <b>8.5</b>  |
| 2000                                 | 4.67 | 10.9 | 6.6 | 10.4 | 6.5 | 11.3 | 6.6 | 12   | 6.9  | 14.5 | 8   | <b>15.2</b> | <b>8.4</b>  |
| A <sub>6</sub> -DNA <sup>m1A16</sup> |      |      |     |      |     |      |     |      |      |      |     |             |             |
| 10                                   | 2.92 | 13.2 | 9.3 | 14.7 | 7.3 | 14.1 | 6.3 | 11.8 | 5.8  | 17.6 | 8.6 | <b>22.7</b> | <b>10.3</b> |
| 20                                   | 2.46 | 12.6 | 8.4 | 14.3 | 7.8 | 14   | 6.3 | 13.7 | 8.8  | 18   | 9.4 | <b>23.8</b> | <b>10.8</b> |
| 30                                   | 2.46 | 11.1 | 7.6 | 12.4 | 7.8 | 12.1 | 6   | 11.6 | 7.5  | 17.7 | 9.1 | <b>23.6</b> | <b>10.4</b> |
| 50                                   | 2.53 | 11.9 | 7.3 | 13.2 | 7   | 13.4 | 6.5 | 13.5 | 6.8  | 17.9 | 8.2 | <b>23.9</b> | <b>10</b>   |
| 80                                   | 2.72 | 12.2 | 7.3 | 13.7 | 7.7 | 13.4 | 7.5 | 13   | 7.1  | 17.3 | 7.6 | <b>23.1</b> | <b>9.6</b>  |
| 100                                  | 2.81 | 12.1 | 7.6 | 13.1 | 7.4 | 12.6 | 7.1 | 12.4 | 6.9  | 17.4 | 7.4 | <b>22.9</b> | <b>9.5</b>  |
| 150                                  | 3.04 | 12.3 | 7.1 | 12.7 | 7.1 | 12.2 | 6.7 | 12.6 | 6.6  | 17.1 | 7.6 | <b>23.1</b> | <b>9.3</b>  |
| 200                                  | 3.22 | 12.1 | 6.7 | 12.2 | 6.9 | 11.8 | 6.6 | 12.3 | 6.7  | 16.7 | 7.6 | <b>22.5</b> | <b>9</b>    |
| 300                                  | 3.49 | 12   | 6.7 | 11.9 | 6.7 | 11.5 | 6.3 | 11.9 | 6.5  | 16.4 | 7.6 | <b>22.4</b> | <b>8.8</b>  |
| 400                                  | 3.71 | 11.8 | 6.6 | 11.5 | 6.6 | 11.1 | 6.2 | 11.6 | 6.3  | 16.1 | 7.5 | <b>22.2</b> | <b>8.7</b>  |
| 500                                  | 3.9  | 11.5 | 6.5 | 11.3 | 6.5 | 10.9 | 5.9 | 11.2 | 6.1  | 16   | 7.3 | <b>21.9</b> | <b>8.7</b>  |
| 800                                  | 4.31 | 11.4 | 6.6 | 10.9 | 6.3 | 10.8 | 5.9 | 11.2 | 6.1  | 15.9 | 7.2 | <b>21.7</b> | <b>8.8</b>  |
| 1000                                 | 4.53 | 11.2 | 6.4 | 10.8 | 6.3 | 10.8 | 5.8 | 11   | 6.1  | 15.7 | 7.1 | <b>21.7</b> | <b>8.7</b>  |
| 1500                                 | 4.95 | 10.8 | 6.2 | 10.5 | 6.3 | 10.7 | 5.8 | 10.6 | 6    | 15.4 | 7   | <b>21.6</b> | <b>8.7</b>  |
| 2000                                 | 5.28 | 10.6 | 6   | 10.2 | 6   | 10.4 | 5.6 | 10.2 | 5.9  | 15.1 | 7   | <b>21.3</b> | <b>8.7</b>  |
| 10                                   | 2.92 | 13.2 | 9.3 | 14.7 | 7.3 | 14.1 | 6.3 | 11.8 | 5.8  | 17.6 | 8.6 | <b>22.7</b> | <b>10.3</b> |

**Table S5.** Robustness of local kinking angles ( $\beta_h$ ) with various RDC data sets.

| Type                               | Construct                            | Global Bending ( $^\circ$ ) | Local Kinking Angles $\beta_h$ ( $^\circ$ ) |        |        |         |        |                |
|------------------------------------|--------------------------------------|-----------------------------|---------------------------------------------|--------|--------|---------|--------|----------------|
|                                    |                                      |                             | 4-21                                        | 5-20   | 6-19   | 7-18    | 8-17   | 9-16           |
| Ensemble<br>(no terminal RDCs)     | A <sub>2</sub> -DNA                  | 11 ± 5                      | 21 ± 8                                      | 22 ± 6 | 21 ± 8 | 19 ± 10 | 19 ± 8 | <b>17 ± 7</b>  |
|                                    | A <sub>2</sub> -DNA <sup>m1A16</sup> | 15 ± 8                      | 23 ± 8                                      | 21 ± 7 | 18 ± 8 | 17 ± 9  | 22 ± 8 | <b>26 ± 9</b>  |
|                                    | A <sub>6</sub> -DNA                  | 14 ± 8                      | 11 ± 7                                      | 10 ± 6 | 12 ± 7 | 14 ± 9  | 17 ± 9 | <b>15 ± 8</b>  |
|                                    | A <sub>6</sub> -DNA <sup>m1A16</sup> | 22 ± 10                     | 12 ± 8                                      | 13 ± 8 | 13 ± 6 | 13 ± 7  | 18 ± 8 | <b>23 ± 10</b> |
| Ensemble<br>(no 2bp terminal RDCs) | A <sub>2</sub> -DNA                  | 11 ± 5                      | 21 ± 8                                      | 22 ± 7 | 21 ± 9 | 19 ± 9  | 19 ± 8 | <b>18 ± 8</b>  |
|                                    | A <sub>2</sub> -DNA <sup>m1A16</sup> | 15 ± 7                      | 24 ± 8                                      | 20 ± 7 | 18 ± 7 | 17 ± 9  | 21 ± 9 | <b>25 ± 9</b>  |
|                                    | A <sub>6</sub> -DNA                  | 15 ± 8                      | 10 ± 7                                      | 9 ± 6  | 10 ± 7 | 11 ± 8  | 15 ± 8 | <b>15 ± 8</b>  |
|                                    | A <sub>6</sub> -DNA <sup>m1A16</sup> | 22 ± 11                     | 11 ± 6                                      | 13 ± 7 | 12 ± 7 | 12 ± 7  | 18 ± 8 | <b>24 ± 11</b> |

## XPLOR parameters used for m1A residue (nucleic.top modified to include the following)

RESIDue A1M

```
GROUP
  ATOM P      TYPE=XP      CHARge=1.20  END
  ATOM O1P    TYPE=XO2     CHARge=-0.40  END
  ATOM O2P    TYPE=XO2     CHARge=-0.40  END
  ATOM O5'    TYPE=XOS     CHARge=-0.36  END
GROUP
  ATOM C5'    TYPE=XC2     CHARge=-0.070  END! "
  ATOM H5'    TYPE=XH      CHARge=0.035  END! "
  ATOM H5' '  TYPE=XH      CHARge=0.035  END! "
GROUP
  ATOM C4'    TYPE=XCH     CHARge=0.065  END! "
  ATOM H4'    TYPE=XH      CHARge=0.035  END! "
  ATOM O4'    TYPE=XOS     CHARge=-0.30  END
  ATOM C1'    TYPE=XCH     CHARge=0.165  END! "
  ATOM H1'    TYPE=XH      CHARge=0.035  END! "
GROUP
  ATOM N9     TYPE=XNS     CHARge=-0.19  END
  ATOM C4     TYPE=XCB     CHARge=0.19  EXCL=( N1 )  END
GROUP
  ATOM N3     TYPE=XNC     CHARge=-0.26  EXCL=( C6 )  END
  ATOM C2     TYPE=XCE     CHARge=0.225  EXCL=( C5 )  END ! "
  ATOM H2     TYPE=XH      CHARge=0.035  END! "
GROUP ! N1Me is added here
  ATOM N1     TYPE=XNC     CHARge=0.685  END
  ATOM C6     TYPE=XCA     CHARge=0.28  END
  ATOM C1     TYPE=XC3     CHARge=-0.070  END! "
  ATOM H11    TYPE=XH      CHARge=0.035  END! "
  ATOM H12    TYPE=XH      CHARge=0.035  END! "
  ATOM H13    TYPE=XH      CHARge=0.035  END! "
GROUP
  ATOM N6     TYPE=XN2     CHARGE=-0.42  END!
  ATOM H61    TYPE=XH2     CHARge=0.21  END!
  ATOM H62    TYPE=XH2     CHARge=0.21  END!
GROUP
  ATOM C5     TYPE=XCB     CHARge=0.02  END
  ATOM N7     TYPE=XNB     CHARge=-0.25  END
  ATOM C8     TYPE=XCE     CHARge=0.195  END! "
  ATOM H8     TYPE=XH      CHARge=0.035  END! "
```

GROUP

ATOM C2' TYPE=XCH CHARGE=0.115 END!"  
ATOM H2'' TYPE=XH CHARGE=0.035 END!"  
ATOM O2' TYPE=XOH CHARGE=-0.40 END  
ATOM H2' TYPE=XHO CHARGE=0.25 END

GROUP

ATOM C3' TYPE=XCH CHARGE=-0.035 END!"  
ATOM H3' TYPE=XH CHARGE=0.035 END!"

GROUP

ATOM O3' TYPE=XOS CHARGE=-0.36 END

BOND P O1P BOND P O2P BOND P O5'  
BOND O5' C5' BOND C5' C4' BOND C4' O4' BOND C4' C3' BOND O4' C1'  
BOND C1' N9 BOND C1' C2' BOND N9 C4 BOND N9 C8 BOND C4 N3  
BOND C4 C5 BOND N3 C2 BOND C2 N1 BOND N1 C6 BOND C6 N6  
BOND N6 H61 BOND N6 H62 BOND C6 C5 BOND C5 N7 BOND N7 C8  
BOND C2' C3' BOND C2' O2' BOND O2' H2' BOND C3' O3' { \* BOND O3'+P \*}  
BOND C1' H1' BOND C2' H2'' BOND C3' H3' BOND C4' H4' BOND C5' H5'  
BOND C5' H5'' BOND C8 H8 BOND C2 H2

! For N1Me

**BOND N1 C1 BOND C1 H11 BOND C1 H12 BOND C1 H13**

{ \* DIHE -O3' P O5' C5' DIHE -O3' P O5' C5' \* }

DIHE P O5' C5' C4' DIHE O5' C5' C4' O4' DIHE O5' C5' C4' C3'

{ \* DIHE C4' C3' O3' +P DIHE C3' O3' +P +O5' DIHE C3' O3' +P +O5' \* }

DIHE O4' C1' N9 C4

! N O T E : SUGAR RING TERMS SET UP AS W. OLSON DOES IT

DIHE O4' C1' C2' C3' ! O-C-C-C, twofold term

DIHE O4' C1' C2' C3'

DIHE C1' C2' C3' C4'

DIHE C2' C3' C4' O4' ! O-C-C-C, twofold term

DIHE C2' C3' C4' O4'

DIHE C3' C4' O4' C1'

DIHE C4' O4' C1' C2'

! AND THE SPECIAL GAUCHE TERMS

DIHE C5' C4' C3' O3'

DIHE O4' C4' C3' O3'

DIHE O4' C1' C2' O2'

DIHE C1' C2' C3' O3'

DIHE C4' C3' C2' O2'

DIHE O3' C3' C2' O2'

DIHE C3' C2' O2' H2'

! SO THE ALLHYDROGEN TERMS

DIHE O4' C4' C3' H3'

DIHE O4' C1' C2' H2''

DIHE C4' O4' C1' H1'

DIHE C1' O4' C4' H4'

DIHE C3' C4' C5' H5'

DIHE C3' C4' C5' H5''

! For N1Me

DIHE C6 N1 C1 H11

DIHE C6 N1 C1 H12

DIHE C6 N1 C1 H13

IMPRoper H11 H12 N1 H13 ! copied from thy methyl

IMPRoper C1 C2 C6 N1

! Dihedrals to keep the two purine rings parallel:

impr C8 C4 C5 N1 impr C8 C5 C4 C2

impr N3 C4 C5 N7 impr C6 C5 C4 N9

! The ring-spanning impropers have been left out.

!IMPR C5' O4' C3' C4' IMPR O3' C2' C4' C3' IMPR N9 C2' O4' C1'

{\* chiral impropers included for DG and SA \*}

improper H1' C2' O4' N9

improper H2'' C3' C1' O2'

improper H3' C4' C2' O3'

improper H4' C5' C3' O4'

{\* chiral improper included for H5'/H5'' definition, according to \*}

{\* Wijmenga, Mooren and Hilbers in NMR of nucl. acids, (Ed. Roberts) \*}

improper H5' O5' H5'' C4' !C5'

IMPR C1' C4 C8 N9

IMPR N9 C4 C5 N7 IMPR C4 C5 N7 C8 IMPR C5 N7 C8 N9

IMPR N7 C8 N9 C4 IMPR C8 N9 C4 C5 IMPR N6 N1 C5 C6

IMPR H62 C6 H61 N6 IMPR C4 N3 C2 N1 IMPR N3 C2 N1 C6

IMPR C2 N1 C6 C5 IMPR N1 C6 C5 C4 IMPR C6 C5 C4 N3

IMPR C5 C4 N3 C2 IMPR H8 N7 N9 C8

IMPR H2 N1 N3 C2

!IMPR C2' C3' C1' O2'

! this first improper is insufficient to keep the N2 group coplanar,

! so I'm adding more. JJK 3/10/04

! Changed signs to match Discover? params, JJK 3/16/04

! Changed them back to match IUPAC (Eur J Biochem 131,9, fig 2) JJK 7/19/04

IMPRoper C5 C6 N6 H61  
IMPRoper N1 C6 N6 H62  
IMPRoper C5 C6 H61 H62  
IMPRoper N1 C6 H62 H61  
DONO H61 N6  
DONO H62 N6  
DONO H2' O2'

ACCE N3 " "  
ACCE N1 " "  
ACCE N7 " "  
ACCE O1P P  
ACCE O2P P  
ACCE O2' " "  
ACCE O3' " "  
ACCE O4' " "  
ACCE O5' " "

{\* IC -O3' P O5' C5' 1.6001 101.45 -39.25 119.00 1.4401 \*}  
{\* IC -O3' O5' \*P O1P 1.6001 101.45 -115.82 109.74 1.4802 \*}  
{\* IC -O3' O5' \*P O2P 1.6001 101.45 115.90 109.80 1.4801 \*}  
IC P O5' C5' C4' 1.5996 119.00 -151.39 110.04 1.5160  
IC O5' C5' C4' C3' 1.4401 108.83 -179.85 116.10 1.5284  
IC C5' C4' C3' O3' 1.5160 116.10 76.70 115.12 1.4212  
{\* IC C4' C3' O3' +P 1.5284 111.92 159.13 119.05 1.6001 \*}  
{\* IC C3' O3' +P +O5' 1.4212 119.05 -98.86 101.45 1.5996 \*}  
IC O4' C3' \*C4' C5' 1.4572 104.06 -120.04 116.10 1.5160  
IC C2' C4' \*C3' O3' 1.5284 100.16 -124.08 115.12 1.4212  
IC C4' C3' C2' C1' 1.5284 100.16 39.58 102.04 1.5251  
IC C3' C2' C1' N9 1.5284 101.97 144.39 113.71 1.4896  
IC O4' C1' N9 C4 1.5251 113.71 -96.00 125.97 1.3703  
IC C1' C4 \*N9 C8 1.4896 125.97 -179.94 105.00 1.3768  
IC C4 N9 C8 N7 1.3703 105.00 -0.07 113.93 1.2970  
IC C8 N9 C4 C5 1.3768 105.00 0.06 106.60 1.3650  
IC N9 C5 \*C4 N3 1.3703 106.60 -179.93 126.69 1.3486  
IC C5 C4 N3 C2 1.3650 126.69 -0.04 111.18 1.3130  
IC C4 N3 C2 N1 1.3486 111.18 -0.02 128.64 1.3399  
IC N3 C2 N1 C6 1.3130 128.64 0.06 118.95 1.3456  
IC C5 N1 \*C6 N6 1.4034 117.43 -179.96 119.06 1.3410  
IC N1 C6 N6 H61 1.3456 119.06 179.96 120.00 1.0100  
IC H61 C6 \*N6 H62 1.0100 120.00 180.00 120.00 1.0100

IC C1' C3' \*C2' O2' 1.5284 102.04 -114.67 110.81 1.4212 !INFERENCE  
IC H2' O2' C2' C3' 0.9600 114.97 148.63 111.92 1.5284 !GUESS

! the all hydrogen part (NOT TOO CAREFULLY DONE /LN)

IC O4' C2' \*C1' H1' 0.0 0.0 -115.0 0.0 0.0  
IC C1' C3' \*C2' H2'' 0.0 0.0 115.0 0.0 0.0  
IC C2' C4' \*C3' H3' 0.0 0.0 115.0 0.0 0.0  
IC C3' O4' \*C4' H4' 0.0 0.0 -115.0 0.0 0.0  
IC C4' O5' \*C5' H5' 0.0 0.0 -115.0 0.0 0.0  
IC C4' O5' \*C5' H5'' 0.0 0.0 115.0 0.0 0.0

! THE BASE:

IC N9 N7 \*C8 H8 0.0 0.0 180.0 0.0 0.0  
IC N1 N3 \*C2 H2 0.0 0.0 180.0 0.0 0.0

END {\* A1M \*}

## References

1. Farjon, J., Boisbouvier, J., Schanda, P., Pardi, A., Simorre, J.-P. and Brutscher, B. (2009) Longitudinal-Relaxation-Enhanced NMR Experiments for the Study of Nucleic Acids in Solution. *J. Am. Chem. Soc.*, **131**, 8571-8577.
2. Yang, H., Zhan, Y., Fenn, D., Chi, L.M. and Lam, S.L. (2008) Effect of 1-methyladenine on double-helical DNA structures. *FEBS Lett.*, **582**, 1629-1633.
3. Yang, S., Salmon, L. and Al-Hashimi, H.M. (2014) Measuring similarity between dynamic ensembles of biomolecules. *Nat. Meth.*, **11**, 552-554.
